# Supplementary material for: Structural and functional analysis of rare missense mutations in human chorionic gonadotrophin β-subunit
Source: PubMed Central journal article supplement — Mol Hum Reprod. 2012 May 3;18(8):379–90. doi: 10.1093/molehr/gas018 (PMC3389497; doi:10.1093/molehr/gas018), 2012-05-03

**Figure S3.** Alignment of the transcribed sequences of the *hCGβ* coding genes. Multiple sequence alignment has been performed with ClustalW2 alignment tool (<http://www.ebi.ac.uk/Tools/msa/clustalw2/>) and using mRNA sequence stretch from -12 nucleotides (relative to ATG) until the 3' end of the transcript (GenBank references: NM\_033183.2 for *CGB8*, NM\_033043.1 for *CGB5*, NM\_000737.2 for *CGB*, NM\_033142.1 for *CGB7*). Nucleotide differences between the aligned coding sequences are highlighted in bold; START (ATG) and STOP (TAA) codons are designated with frames. Primers used for the amplification of the *hCGβ* coding region and construction of the wild-type *hCGβ* plasmid are indicated by arrows. *hCGβ* mutations under study are highlighted in grey.

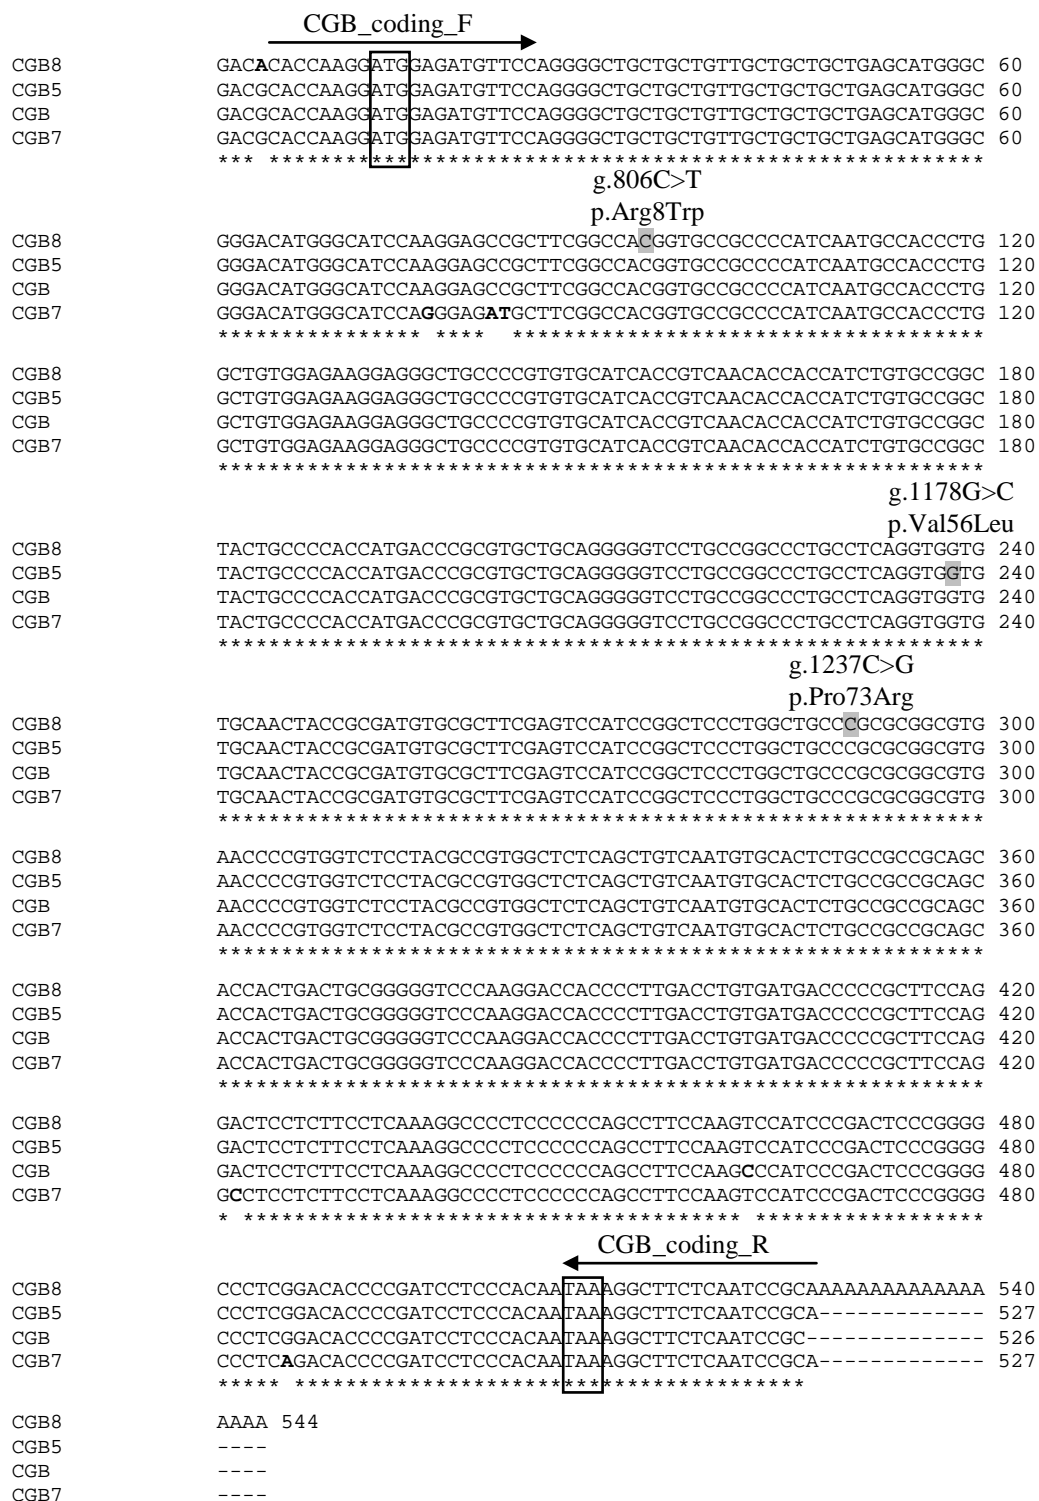

Supplement: supp_gas018_gas018supp_fig3.pdf [file supp_gas018_gas018supp_fig3.pdf]
