# Supplementary material for: Structural and functional analysis of rare missense mutations in human chorionic gonadotrophin β-subunit
Source: PubMed Central journal article supplement — Mol Hum Reprod. 2012 May 3;18(8):379–90. doi: 10.1093/molehr/gas018 (PMC3389497; doi:10.1093/molehr/gas018), 2012-05-03

**Figure S4.** Selected fragments of 10-30 ns averaged MD structures of wild-type (a, c, e) and mutant hCG: (b) p.V56L, (d) p.P73R, (f) p.R8W. Hydrogen bonds are shown as dotted lines, positions under study are highlighted in red. Residues of hCG  $\alpha$ -subunit are denoted with '.A' and residues of the  $\beta$ -subunit with '.B'. Only some residues are displayed to avoid cluttering.

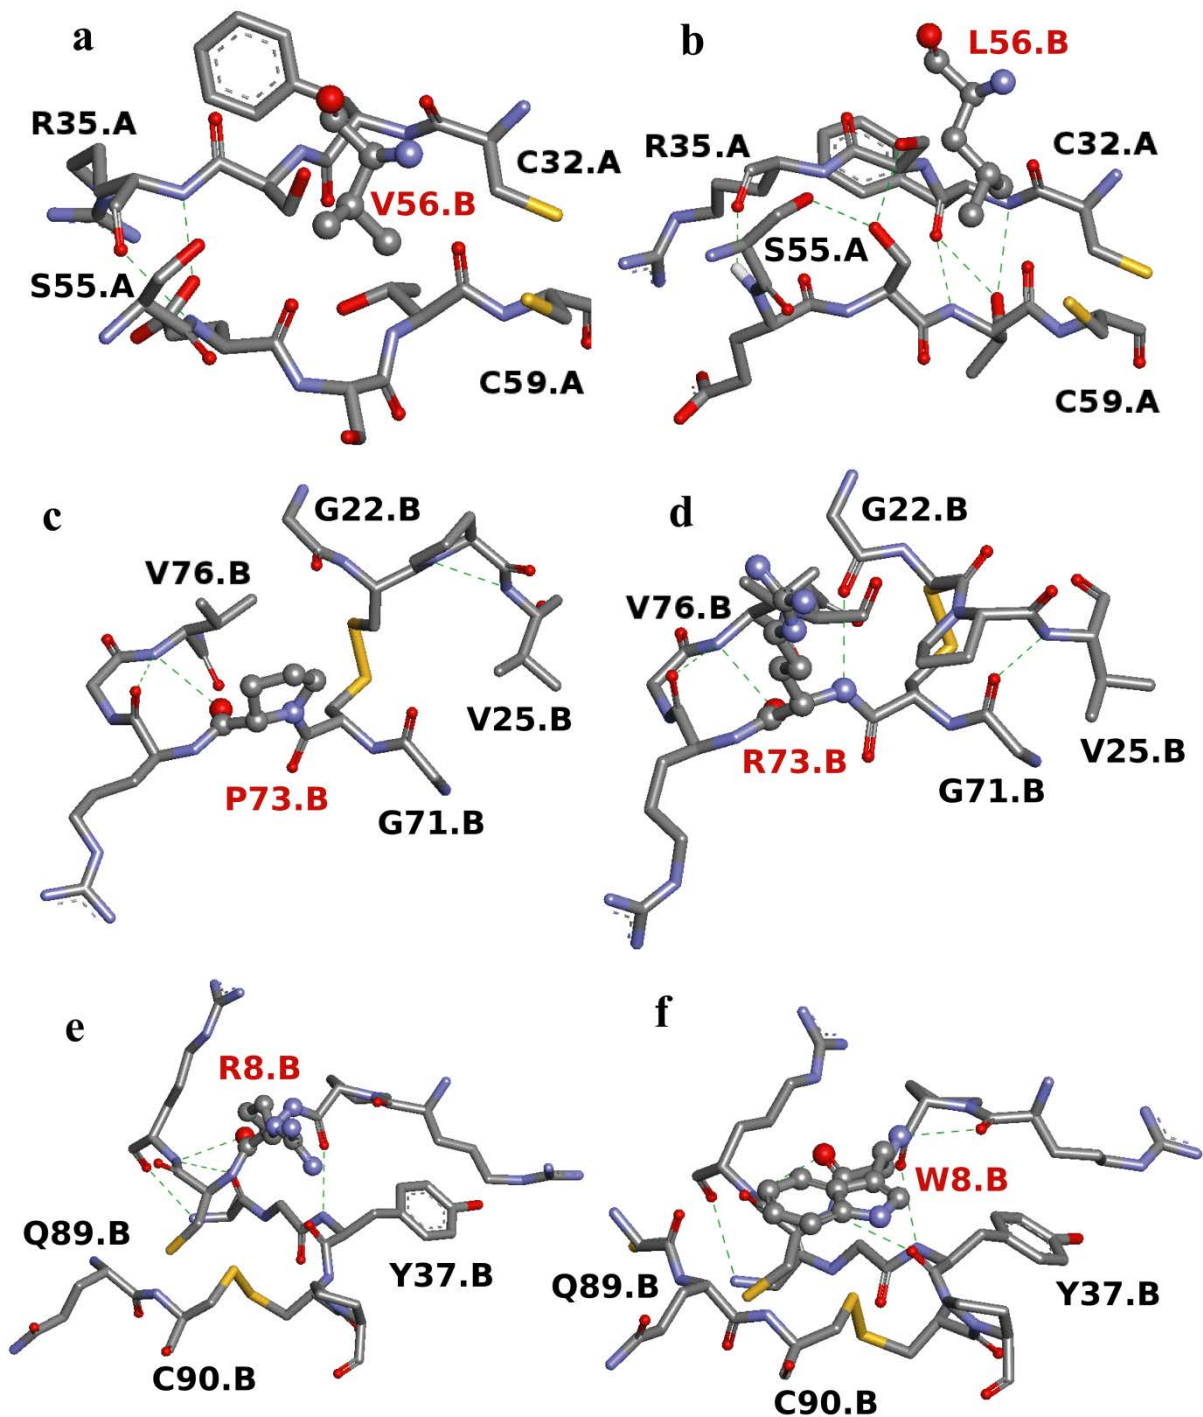

Supplement: supp_gas018_gas018supp_fig4.pdf [file supp_gas018_gas018supp_fig4.pdf]
