# Supplementary material for: Structural and functional analysis of rare missense mutations in human chorionic gonadotrophin β-subunit
Source: PubMed Central journal article supplement — Mol Hum Reprod. 2012 May 3;18(8):379–90. doi: 10.1093/molehr/gas018 (PMC3389497; doi:10.1093/molehr/gas018), 2012-05-03
Supplement: supp_gas018_gas018supp_table1.pdf [file supp_gas018_gas018supp_table1.pdf]

**Table S1.** List of hCG $\beta$  homologs used for the analysis of the hCG $\beta$  positional amino acid variability.

| Seq. no. | Species                           | Protein                | Accession no. (NCBI) |
|----------|-----------------------------------|------------------------|----------------------|
| 1        | <i>Homo sapiens</i>               | CG $\beta$             | NP_149032.1          |
| 2        | <i>Homo sapiens</i>               | LH $\beta$             | NP_000885.1          |
| 3        | <i>Papio anubis</i>               | CG $\beta$             | NP_001106126.1       |
| 4        | <i>Macaca fascicularis</i>        | LH $\beta$             | Q6EV78.1             |
| 5        | <i>Nomascus leucogenys</i>        | PREDICTED: CG $\beta$  | XP_003269724.1       |
| 6        | <i>Felis catus</i>                | LH $\beta$             | NP_001009277.1       |
| 7        | <i>Bos taurus</i>                 | PREDICTED: LH $\beta$  | NP_776355.1          |
| 8        | <i>Equus asinus</i>               | LH $\beta$ /CG $\beta$ | P19794.2             |
| 9        | <i>Octodon degus</i>              | LH $\beta$             | BAE95638.1           |
| 10       | <i>Microtus montebelli</i>        | LH $\beta$             | BAE95634.1           |
| 11       | <i>Cavia porcellus</i>            | LH $\beta$             | NP_001166301.1       |
| 12       | <i>Aotus nancymae</i>             | CG $\beta$             | Q3HRV3.1             |
| 13       | <i>Callithrix jacchus</i>         | PREDICTED: CG $\beta$  | XP_002762382.1       |
| 14       | <i>Callicebus moloch</i>          | CG $\beta$             | AAL69731.1           |
| 15       | <i>Saimiri boliviensis boli</i>   | CG $\beta$             | Q3S2X5.1             |
| 16       | <i>Cebus apella</i>               | CG $\beta$             | CAQ52837.1           |
| 17       | <i>Hypophthalmichthys nobilis</i> | LH $\beta$             | ABQ42715.1           |
| 18       | <i>Clarias gariepinus</i>         | CG $\beta$             | P53543.1             |
| 19       | <i>Conger myriaster</i>           | CG $\beta$             | BAB97391.1           |
| 20       | <i>Danio rerio</i>                | LH $\beta$             | NP_991186.1          |
| 21       | <i>Oncorhynchus tshawytscha</i>   | CG $\beta$             | P07732.1             |
| 22       | <i>Clupea harengus</i>            | CG $\beta$             | Q9YGH2.1             |
| 23       | <i>Plecoglossus altivelis</i>     | CG $\beta$             | AAM92270.1           |
| 24       | <i>Acipenser baerii</i>           | LH $\beta$             | CAB93502.1           |
| 25       | <i>Takifugu niphobles</i>         | LH $\beta$             | BAJ12080.1           |
| 26       | <i>Oreochromis niloticus</i>      | LH $\beta$             | AAP49576.1           |
| 27       | <i>Amphiprion melanopus</i>       | LH $\beta$             | ACR08088.1           |
| 28       | <i>Pagrus major</i>               | CG $\beta$             | BAB18564.1           |
| 29       | <i>Hippoglossus hippoglossus</i>  | LH $\beta$             | CAD10502.1           |
| 30       | <i>Odontesthes bonariensis</i>    | LH $\beta$             | AAP85607.3           |
| 31       | <i>Gasterosteus aculeatus</i>     | LH $\beta$             | CAD59185.1           |
| 32       | <i>Periophthalmus modestus</i>    | LH $\beta$             | BAF43300.1           |
| 33       | <i>Mauremys reevesii</i>          | LH $\beta$             | BAB92949.1           |
| 34       | <i>Alligator mississippiensis</i> | LH $\beta$             | BAJ14507.1           |
| 35       | <i>Scyliorhinus canicula</i>      | LH $\beta$             | CAC43236.1           |
| 36       | <i>Cynops pyrrhogaster</i>        | LH $\beta$             | BAB92959.1           |
| 37       | <i>Neoceratodus forsteri</i>      | LH $\beta$             | CAE17335.1           |
